# Supplementary material for: Predictors of Antidepressant Nonadherence Among Older Veterans With Depression
Source: Atypon-hosted journal article supplement (doi:10.1176/appi.ps.201500120), 2016-04-01
Supplement: appi.ps.201500120.ds001.pdf [file appi.ps.201500120.ds001.pdf]

## Appendix 1. Consort

Figure 1. Study Flowchart

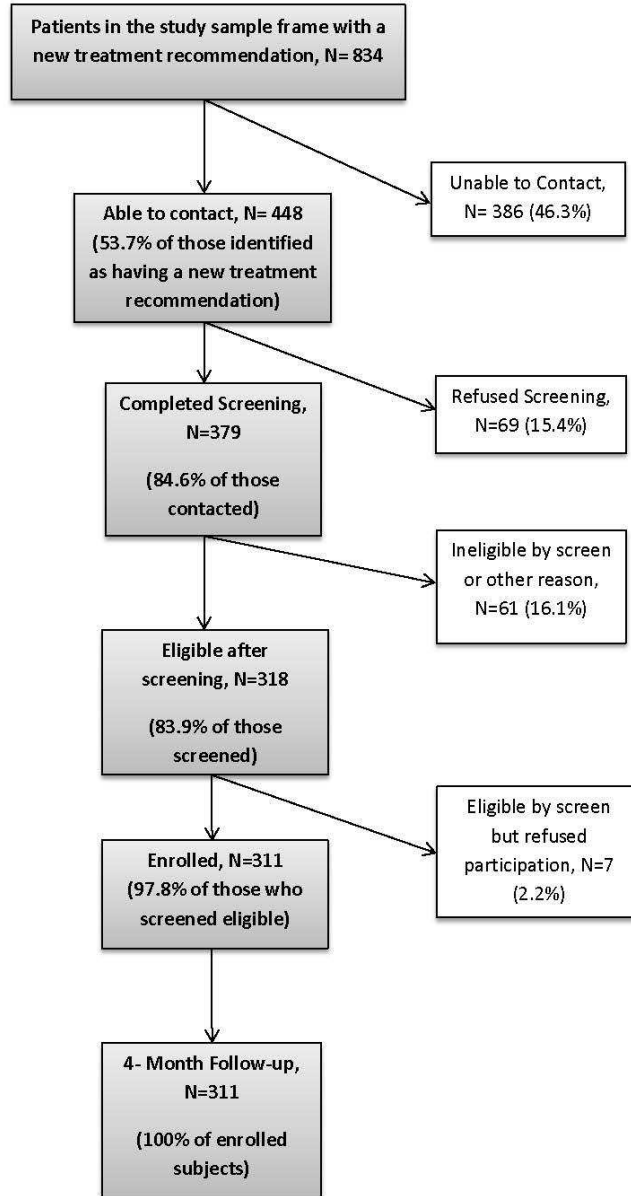

Table



## Appendix 2. Covariate adjusted odds ratio estimates based on logistic regression models for non-adherence in antidepressant at 4-month follow-up

| Variable                                                                            | Model 1 |              |         | Model 2 |              |         | Model 3 |              |         | Model 4 |              |         | Model 5 |              |         | Model 6 |              |         |
|-------------------------------------------------------------------------------------|---------|--------------|---------|---------|--------------|---------|---------|--------------|---------|---------|--------------|---------|---------|--------------|---------|---------|--------------|---------|
|                                                                                     | AOR     | 95%CI        | P value |
| Black                                                                               | 3.20    | 1.71- 6.01** | <.001   | 3.54    | 1.76- 7.11** | <.001   | 3.84    | 1.88- 7.84** | <.001   | 4.25    | 2.03- 8.91** | <.001   | 4.24    | 2.02- 8.87** | <.001   | 4.23    | 2.01- 8.88** | <.001   |
| Without partner or spouse                                                           | 2.02    | 1.20- 3.38** | .008    | 1.67    | .96- 2.92    | .070    | 1.73    | .99- 3.03    | .056    | 1.79    | 1.01- 3.17*  | .045    | 1.82    | 1.03- 3.22*  | .041    | 1.82    | 1.03- 3.23*  | .041    |
| Charlson's comorbidity index                                                        |         |              |         | 1.31    | 1.11- 1.54** | .002    | 1.33    | 1.12- 1.58** | .001    | 1.33    | 1.11- 1.59** | .002    | 1.33    | 1.11- 1.58** | .002    | 1.33    | 1.11- 1.58** | .002    |
| Antidepressant prescribed in primary care (reference: prescribed by a psychiatrist) |         |              |         |         |              |         |         |              |         | 1.40    | .76- 2.55    | .277    | 1.33    | .72- 2.44    | .363    | 1.32    | .71- 2.48    | .384    |
| Citalopram/Sertraline (reference: other ADs)                                        |         |              |         |         |              |         |         |              |         |         |              |         | 1.50    | .81- 2.77    | .198    | 1.50    | .81- 2.78    | .203    |
| Seeing a therapist                                                                  |         |              |         |         |              |         |         |              |         |         |              |         |         |              |         | .98     | .51- 1.88    | .952    |
| Female                                                                              | 1.61    | .35- 7.39    | .540    | 1.65    | .35- 7.82    | .530    | 1.55    | .32- 7.40    | .585    | 1.44    | .30- 6.97    | .652    | 1.45    | .29- 7.17    | .646    | 1.45    | .29- 7.18    | .647    |
| Age (reference 60-64)                                                               |         |              |         |         |              |         |         |              |         |         |              |         |         |              |         |         |              |         |
| 65-74                                                                               | 1.71    | .91- 3.22    | .096    | 1.31    | .66- 2.62    | .443    | 1.36    | .68- 2.74    | .382    | 1.26    | .62- 2.56    | .525    | 1.26    | .62- 2.57    | .525    | 1.26    | .62- 2.57    | .530    |
| 75-90                                                                               | 1.32    | .57- 3.05    | .513    | 1.04    | .41- 2.62    | .936    | 1.22    | .46- 3.19    | .692    | 1.20    | .45- 3.23    | .717    | 1.13    | .42- 3.06    | .803    | 1.13    | .42- 3.06    | .806    |
| Education (reference: high school or below)                                         |         |              |         |         |              |         |         |              |         |         |              |         |         |              |         |         |              |         |
| With some college                                                                   | .68     | .41- 1.15    | .155    | .66     | .38- 1.16    | .146    | .64     | .36- 1.12    | .118    | .64     | .36- 1.13    | .122    | .64     | .36- 1.14    | .127    | .64     | .36- 1.14    | .128    |
| Prior depression treatment                                                          |         |              |         | 1.00    | .57- 1.78    | .989    | 1.00    | .56- 1.78    | .999    | 1.03    | .57- 1.84    | .930    | 1.12    | .62- 2.04    | .704    | 1.12    | .62- 2.04    | .707    |
| Physical component summary of SF12 (PCS)                                            |         |              |         | 1.01    | .98- 1.04    | .404    | 1.01    | .98- 1.04    | .574    | 1.01    | .98- 1.03    | .675    | 1.01    | .98- 1.03    | .689    | 1.01    | .98- 1.03    | .693    |
| Mental component summary of SF12 (MCS)                                              |         |              |         | 1.00    | .96- 1.03    | .791    | .99     | .96- 1.03    | .753    | .99     | .96- 1.03    | .633    | .99     | .96- 1.03    | .696    | .99     | .96- 1.03    | .694    |
| Patient Health Questionnaire (PHQ-9)                                                |         |              |         | 1.05    | .98- 1.12    | .183    | 1.05    | .98- 1.12    | .170    | 1.05    | .98- 1.12    | .169    | 1.05    | .98- 1.13    | .148    | 1.05    | .98- 1.13    | .150    |
| HADS Anxiety subscale                                                               |         |              |         | .94     | .86- 1.02    | .137    | .94     | .86- 1.02    | .144    | .93     | .85- 1.02    | .130    | .94     | .86- 1.02    | .149    | .94     | .86- 1.02    | .151    |
| Anxiety sensitivity index (ASI)                                                     |         |              |         | 1.00    | .99- 1.01    | .873    | 1.00    | .99- 1.01    | .884    | 1.00    | .99- 1.01    | .974    | 1.00    | .99- 1.01    | .894    | 1.00    | .99- 1.01    | .894    |
| Delirium                                                                            |         |              |         | .50     | .09- 2.64    | .410    | .49     | .09- 2.71    | .417    | .54     | .10- 3.07    | .490    | .52     | .09- 3.04    | .471    | .52     | .09- 3.05    | .472    |
| Substance abuse                                                                     |         |              |         | 1.29    | .62- 2.69    | .496    | 1.28    | .61- 2.68    | .512    | 1.32    | .63- 2.80    | .463    | 1.27    | .60- 2.70    | .535    | 1.27    | .60- 2.71    | .533    |
| PTSD                                                                                |         |              |         | .55     | .29- 1.06    | .075    | .58     | .30- 1.12    | .104    | .59     | .30- 1.17    | .128    | .62     | .31- 1.23    | .171    | .62     | .31- 1.25    | .182    |
| Other anxiety disorders                                                             |         |              |         | 1.10    | .55- 2.19    | .784    | 1.09    | .55- 2.18    | .800    | 1.13    | .56- 2.27    | .728    | 1.13    | .56- 2.28    | .727    | 1.13    | .56- 2.29    | .725    |
| IADL Total                                                                          |         |              |         |         |              |         | 1.10    | .88- 1.37    | .401    | 1.12    | .89- 1.40    | .327    | 1.13    | .90- 1.41    | .307    | 1.13    | .90- 1.41    | .306    |
| Weschler LNS subscale                                                               |         |              |         |         |              |         | 1.04    | .96- 1.13    | .336    | 1.04    | .95- 1.13    | .376    | 1.04    | .95- 1.13    | .396    | 1.04    | .95- 1.13    | .397    |
| Site of recruitment (reference: Detroit)                                            |         |              |         |         |              |         |         |              |         |         |              |         |         |              |         |         |              |         |
| Battle Creek                                                                        |         |              |         |         |              |         |         |              |         | 1.23    | .56- 2.68    | .603    | 1.21    | .55- 2.66    | .633    | 1.21    | .55- 2.68    | .631    |
| Ann Arbor                                                                           |         |              |         |         |              |         |         |              |         | .77     | .39- 1.53    | .464    | .75     | .38- 1.49    | .412    | .75     | .37- 1.52    | .433    |

AOR, adjusted odds ratio; CI, confidence interval. All df's are 1.

Model 1: adjusted for demographic variables of age and education.

Model 2: adjusted for demographic variables and illness burden variables including Charlson's comorbidity index, prior treatment of depression, physical component summary score (PCS), mental component summary score (MCS), depression score on patient health questionnaire (PHQ total), hospital anxiety depression score (HADS total), and anxiety sensitivity index (ASI total), delirium, substance abuse, posttraumatic stress disorder, and other anxieties.

Model 3: adjusted for demographic variables, illness burden variables, and functional status variables including instrumental activities of daily living (IADL total) and Weschler memory scale.

Model 4: adjusted for demographic variables, illness burden variables, functional status variables, site of recruitment, and medical setting.

Model 5: adjusted for demographic variables, illness burden variables, functional status variables, site of recruitment, medical setting, and type of antidepressant.

Model 6: adjusted for demographic variables, illness burden variables, functional status variables, site of recruitment, medical setting, type of antidepressant, and seeing a therapist.

\*p< .05

\*\*p< .01
